# Supplementary material for: Akt/mTOR integrate energy metabolism with Wnt signal to influence wound epithelium growth in Gekko Japonicus
Source: PubMed Central journal article supplement (PMC9515156; doi:10.1038/s42003-022-04004-5), 2022-09-27
Supplement: 42003_2022_4004_MOESM2_ESM.pdf [file 42003_2022_4004_MOESM2_ESM.pdf]

## Description of Additional Supplementary Files

**File name:** Supplementary Data 1

**Description:** The source data behind the graphs in the paper.
